# Supplementary material
Source: MDPI journal article supplement (https://www.mdpi.com/2297-8739/10/7/388)
Supplement: s1 [file s1]

**Table S1. Viability of cell line after treatment with *H. rhodopensis* total extracts or fractions for 48 hours (%)**

|                   | MCF10A   | MCF7     | MDA-MB231 |
|-------------------|----------|----------|-----------|
| untreated         | 100±12   | 100±5.7  | 100±3.4   |
| Total extract 10  | 109±10   | 109±6.7  | 96±3.9    |
| Total extract 100 | 102±12   | 103±8.4  | 116±4.3   |
| Total extract 200 | 86.3±3.3 | 105±8.9  | 76±8.6    |
| Total extract 300 | 73±2     | 71±5.7   | 82±4.6    |
| Fraction 7.       | 79±3.8   | 100±3    | 135±12    |
| Fraction 8        | 78±9     | 100±2    | 99±3      |
| Fraction 10       | 108±8    | 150±6    | 135±5     |
| Fraction 11       | 94±4.8   | 100±9    | 110±1     |
| Fraction 12       | 83±8.8   | 100±3    | 77±3.5    |
| Fraction 13       | 84±8.7   | 78±2     | 70±2      |
| Fraction 14       | 98±3.8   | 60.2±2.1 | 71±7.7    |
| Fraction 15       | 79.8±9.1 | 84±3.7   | 71±4.4    |
| Fraction 16       | 94±8.2   | 80±2.7   | 70.6±3.8  |
| Fraction 17       | 86.6±10  | 65±4.8   | 77.7±1.4  |
| Fraction 18       | 95.5±8.7 | 62±2.9   | 77.3±7.5  |

The concentration of total extract and fractions is in µg/ml. The fractions are applied in concentration 300 µg/ml. The standard errors of the means are presented in the table

**Table S2. Metabolic content of fraction 14. On the first row is Myconoside (14% of total metabolic content).**

| <b>Peak</b> | <b>RT</b>     | <b>Area</b>        | <b>% TIC</b> |
|-------------|---------------|--------------------|--------------|
| <b>25</b>   | <b>10.222</b> | <b>3768245905</b>  | <b>13.78</b> |
| <b>31</b>   | <b>11.702</b> | <b>1889734503</b>  | <b>6.91</b>  |
| <b>88</b>   | <b>33.381</b> | <b>2675000438</b>  | <b>3.56</b>  |
| <b>50</b>   | <b>16.786</b> | <b>2644637516</b>  | <b>3.52</b>  |
| <b>82</b>   | <b>31.437</b> | <b>739519722.7</b> | <b>2.70</b>  |
| <b>26</b>   | <b>10.49</b>  | <b>723044156.6</b> | <b>2.64</b>  |
| <b>24</b>   | <b>9.941</b>  | <b>652300475.2</b> | <b>2.38</b>  |
| <b>1</b>    | <b>1.037</b>  | <b>1630400747</b>  | <b>2.17</b>  |
| <b>80</b>   | <b>30.274</b> | <b>571398912.9</b> | <b>2.09</b>  |
| <b>29</b>   | <b>11.237</b> | <b>509395070.9</b> | <b>1.86</b>  |
| <b>16</b>   | <b>8.264</b>  | <b>491478268.5</b> | <b>1.80</b>  |
| <b>47</b>   | <b>15.158</b> | <b>460907523.2</b> | <b>1.69</b>  |
| <b>28</b>   | <b>10.839</b> | <b>449009787.9</b> | <b>1.64</b>  |
| <b>32</b>   | <b>12.167</b> | <b>444662824.8</b> | <b>1.63</b>  |
| <b>34</b>   | <b>12.466</b> | <b>426427765.5</b> | <b>1.56</b>  |
| <b>6</b>    | <b>4.061</b>  | <b>412634324.8</b> | <b>1.51</b>  |
| <b>76</b>   | <b>29.195</b> | <b>376803650.8</b> | <b>1.38</b>  |
| <b>86</b>   | <b>32.517</b> | <b>349616097.6</b> | <b>1.28</b>  |
| <b>5</b>    | <b>3.38</b>   | <b>344512627</b>   | <b>1.26</b>  |
| <b>36</b>   | <b>12.865</b> | <b>341487606.2</b> | <b>1.25</b>  |
| <b>33</b>   | <b>12.317</b> | <b>338949427.7</b> | <b>1.24</b>  |
| <b>81</b>   | <b>30.955</b> | <b>337343692</b>   | <b>1.23</b>  |
| <b>48</b>   | <b>15.573</b> | <b>333557899</b>   | <b>1.22</b>  |
| <b>87</b>   | <b>32.999</b> | <b>332433994.7</b> | <b>1.22</b>  |
| <b>66</b>   | <b>23.297</b> | <b>328497428.2</b> | <b>1.20</b>  |
| <b>84</b>   | <b>31.985</b> | <b>325727459.2</b> | <b>1.19</b>  |
| <b>22</b>   | <b>9.543</b>  | <b>315471340.8</b> | <b>1.15</b>  |
| <b>30</b>   | <b>11.287</b> | <b>312438307.1</b> | <b>1.14</b>  |
| <b>83</b>   | <b>31.62</b>  | <b>309841415.2</b> | <b>1.13</b>  |
| <b>35</b>   | <b>12.583</b> | <b>297605710.9</b> | <b>1.09</b>  |
| <b>75</b>   | <b>28.979</b> | <b>286499505.1</b> | <b>1.05</b>  |

|    |        |             |      |
|----|--------|-------------|------|
| 74 | 28.115 | 263714892.8 | 0.96 |
| 54 | 18.33  | 246284064   | 0.90 |
| 85 | 32.384 | 244533347.1 | 0.89 |
| 55 | 18.812 | 237098521.1 | 0.87 |
| 56 | 19.095 | 212701327.5 | 0.78 |
| 89 | 33.995 | 211013200   | 0.77 |
| 12 | 7.383  | 210373707.1 | 0.77 |
| 78 | 29.676 | 207055140.3 | 0.76 |
| 21 | 9.31   | 204509134.7 | 0.75 |
| 44 | 14.36  | 195443560.1 | 0.71 |
| 79 | 30.042 | 184430601.3 | 0.67 |
| 45 | 14.51  | 184353713.2 | 0.67 |
| 77 | 29.361 | 179426221.7 | 0.66 |
| 23 | 9.659  | 176564480.3 | 0.65 |
| 39 | 13.447 | 175465559.2 | 0.64 |
| 37 | 13.031 | 173933505.3 | 0.64 |
| 51 | 17.134 | 170027038.6 | 0.62 |
| 13 | 7.549  | 163008705.4 | 0.60 |
| 2  | 1.453  | 161187318.9 | 0.59 |
| 14 | 7.782  | 141999158.8 | 0.52 |
| 57 | 19.643 | 135318378.3 | 0.49 |
| 20 | 9.111  | 130925307.6 | 0.48 |
| 3  | 2.084  | 130852615.1 | 0.48 |
| 27 | 10.706 | 128082626.8 | 0.47 |
| 73 | 27.533 | 126070148.4 | 0.46 |
| 19 | 8.978  | 125738003.9 | 0.46 |
| 15 | 8.081  | 117540147.9 | 0.43 |
| 18 | 8.762  | 113868015.3 | 0.42 |
| 10 | 5.174  | 109844551.7 | 0.40 |
| 17 | 8.579  | 109264731.8 | 0.40 |
| 7  | 4.26   | 108180114.5 | 0.40 |
| 59 | 20.34  | 106636914.6 | 0.39 |
| 72 | 27.101 | 105678965.1 | 0.39 |
| 41 | 13.812 | 97717757.39 | 0.36 |
| 38 | 13.247 | 96330702.41 | 0.35 |
| 69 | 24.66  | 95718211.95 | 0.35 |

|           |               |                    |             |
|-----------|---------------|--------------------|-------------|
| <b>62</b> | <b>21.437</b> | <b>92622127.89</b> | <b>0.34</b> |
| <b>71</b> | <b>26.769</b> | <b>88570761.84</b> | <b>0.32</b> |
| <b>9</b>  | <b>4.675</b>  | <b>87555865.7</b>  | <b>0.32</b> |
| <b>67</b> | <b>23.53</b>  | <b>86656917.03</b> | <b>0.32</b> |
| <b>58</b> | <b>20.025</b> | <b>81419122.77</b> | <b>0.30</b> |
| <b>42</b> | <b>14.094</b> | <b>78801693.78</b> | <b>0.29</b> |
| <b>40</b> | <b>13.613</b> | <b>78584143.18</b> | <b>0.29</b> |
| <b>61</b> | <b>20.889</b> | <b>77676851.18</b> | <b>0.28</b> |
| <b>43</b> | <b>14.178</b> | <b>68483492.13</b> | <b>0.25</b> |
| <b>49</b> | <b>16.254</b> | <b>67804658.17</b> | <b>0.25</b> |
| <b>63</b> | <b>21.968</b> | <b>66453737.03</b> | <b>0.24</b> |
| <b>8</b>  | <b>4.46</b>   | <b>64611207.42</b> | <b>0.24</b> |
| <b>64</b> | <b>22.135</b> | <b>61170472.08</b> | <b>0.22</b> |
| <b>68</b> | <b>24.344</b> | <b>59328787.11</b> | <b>0.22</b> |
| <b>53</b> | <b>18.065</b> | <b>52867561.25</b> | <b>0.19</b> |
| <b>4</b>  | <b>3.097</b>  | <b>52647372.23</b> | <b>0.19</b> |
| <b>11</b> | <b>6.37</b>   | <b>46825708.06</b> | <b>0.17</b> |
| <b>70</b> | <b>24.975</b> | <b>46450943.23</b> | <b>0.17</b> |
| <b>60</b> | <b>20.59</b>  | <b>44763314.28</b> | <b>0.16</b> |
| <b>52</b> | <b>17.815</b> | <b>41561180.11</b> | <b>0.15</b> |
| <b>65</b> | <b>22.5</b>   | <b>41121646.11</b> | <b>0.15</b> |
| <b>46</b> | <b>14.859</b> | <b>39519131.09</b> | <b>0.14</b> |

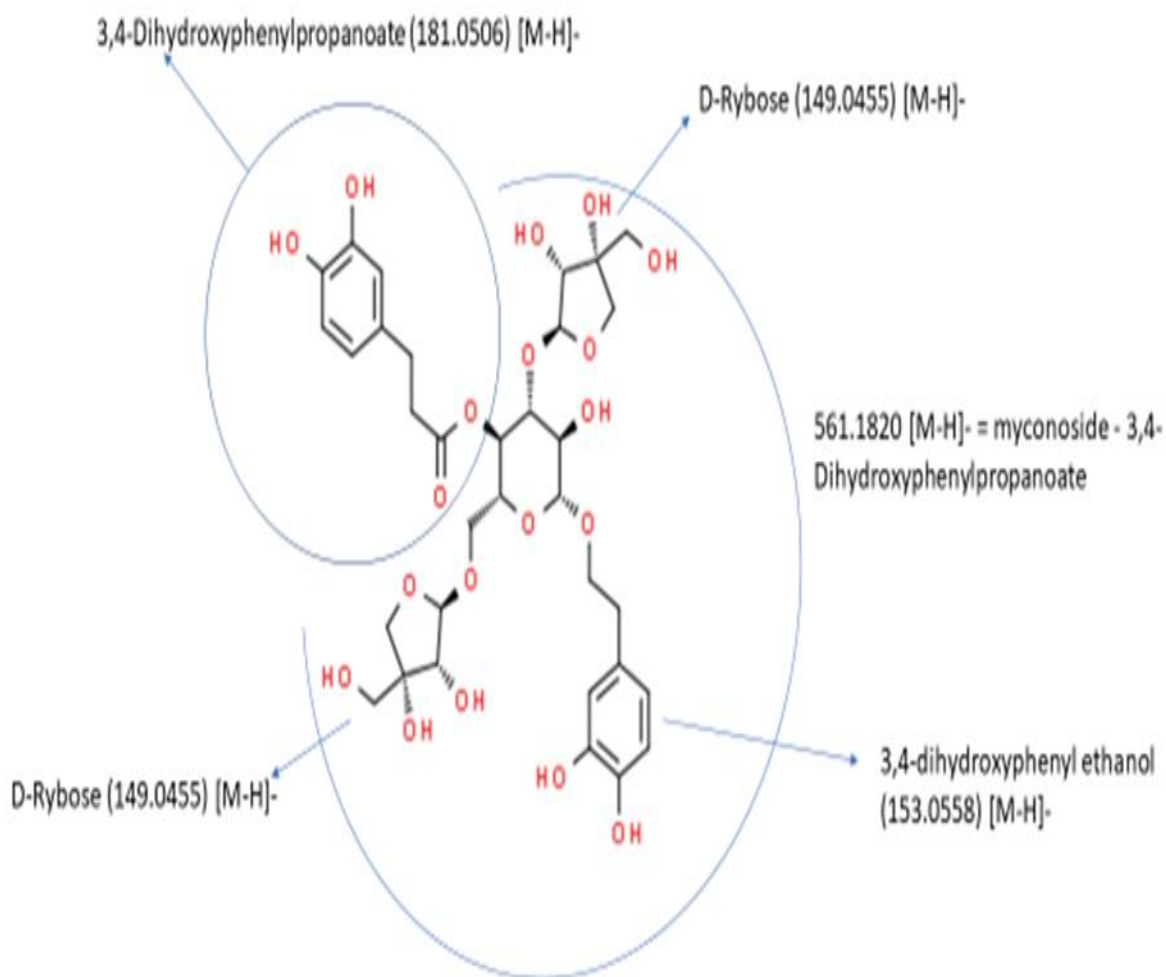

**Figure S1. Molecular structure of Myconoside and detected ion fragments derived from MS/MS spectra**

**Table S3. Metabolic content of fraction18. On the first row is (Hispidulin 8-C-(6-O-acetyl-2''-O-syringoyl- $\beta$ -glu- copyranoside) is 23 % of total metabolic content).**

| Peak | RT     | Area        | % TIC |
|------|--------|-------------|-------|
| 38   | 22.012 | 6016968389  | 23.54 |
| 30   | 17.162 | 2857998612  | 11.18 |
| 31   | 17.561 | 2252716780  | 8.81  |
| 14   | 10.252 | 2124392381  | 8.31  |
| 37   | 19.92  | 1451705932  | 5.68  |
| 29   | 16.929 | 927731971.1 | 3.63  |
| 15   | 10.567 | 865334482.3 | 3.39  |
| 36   | 19.089 | 783676763   | 3.07  |
| 25   | 15.302 | 757935325.4 | 2.97  |
| 23   | 14.87  | 620549011.3 | 2.43  |
| 39   | 22.411 | 509322356.5 | 1.99  |
| 19   | 12.228 | 470694759.6 | 1.84  |
| 27   | 15.584 | 470103697.1 | 1.84  |
| 41   | 23.292 | 448423423.1 | 1.75  |
| 1    | 0.999  | 430426965.7 | 1.68  |
| 48   | 33.392 | 278556598.9 | 1.09  |
| 22   | 14.537 | 273787696.3 | 1.07  |
| 13   | 9.836  | 230522777.1 | 0.90  |
| 43   | 24.471 | 225102941.1 | 0.88  |
| 26   | 15.434 | 224089694.5 | 0.88  |
| 35   | 18.375 | 215313898.1 | 0.84  |
| 40   | 22.993 | 207708178.1 | 0.81  |
| 6    | 8.175  | 196976617.5 | 0.77  |
| 47   | 30.269 | 159797118.7 | 0.63  |
| 44   | 24.654 | 157486189.6 | 0.62  |
| 18   | 11.697 | 157243071.2 | 0.62  |
| 42   | 23.757 | 156005424.1 | 0.61  |
| 2    | 2.062  | 149959961.5 | 0.59  |
| 7    | 8.275  | 145348865.2 | 0.57  |
| 21   | 12.793 | 136662512.6 | 0.53  |
| 17   | 11.58  | 130892297.9 | 0.51  |
| 8    | 8.79   | 115074511.4 | 0.45  |
| 32   | 17.976 | 110770993   | 0.43  |
| 33   | 18.076 | 109939278.6 | 0.43  |

|    |        |             |      |
|----|--------|-------------|------|
| 16 | 10.8   | 107783871.3 | 0.42 |
| 49 | 33.558 | 103170704.8 | 0.40 |
| 3  | 4.039  | 97510129.63 | 0.38 |
| 10 | 9.437  | 93006070.65 | 0.36 |
| 24 | 15.019 | 87295615.83 | 0.34 |
| 9  | 9.105  | 85254578.72 | 0.33 |
| 28 | 16.049 | 82138815.93 | 0.32 |
| 12 | 9.67   | 75896934.35 | 0.30 |
| 5  | 7.378  | 74850812.65 | 0.29 |
| 20 | 12.478 | 67505384.39 | 0.26 |
| 4  | 6.73   | 66980294.99 | 0.26 |
| 46 | 29.172 | 63870656.48 | 0.25 |
| 11 | 9.57   | 61671016.44 | 0.24 |
| 34 | 18.275 | 61161396.86 | 0.24 |
| 45 | 25.019 | 60859657.28 | 0.24 |

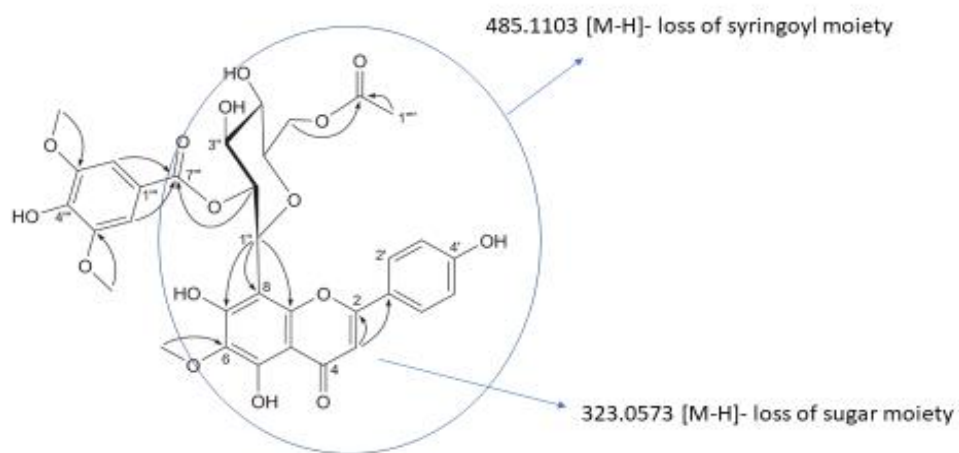

**Figure S2. Molecular structure of Hispidulin 8-C-(6-O-acetyl-2''-O-syringoyl-β-glucopyranoside) and detected ion fragments derived from MS/MS spectra**

**NMR identification of Myconoside and Hispidulin 8-C-(6-O-acetyl-2''-O-syringoyl-β-glucopyranoside)**

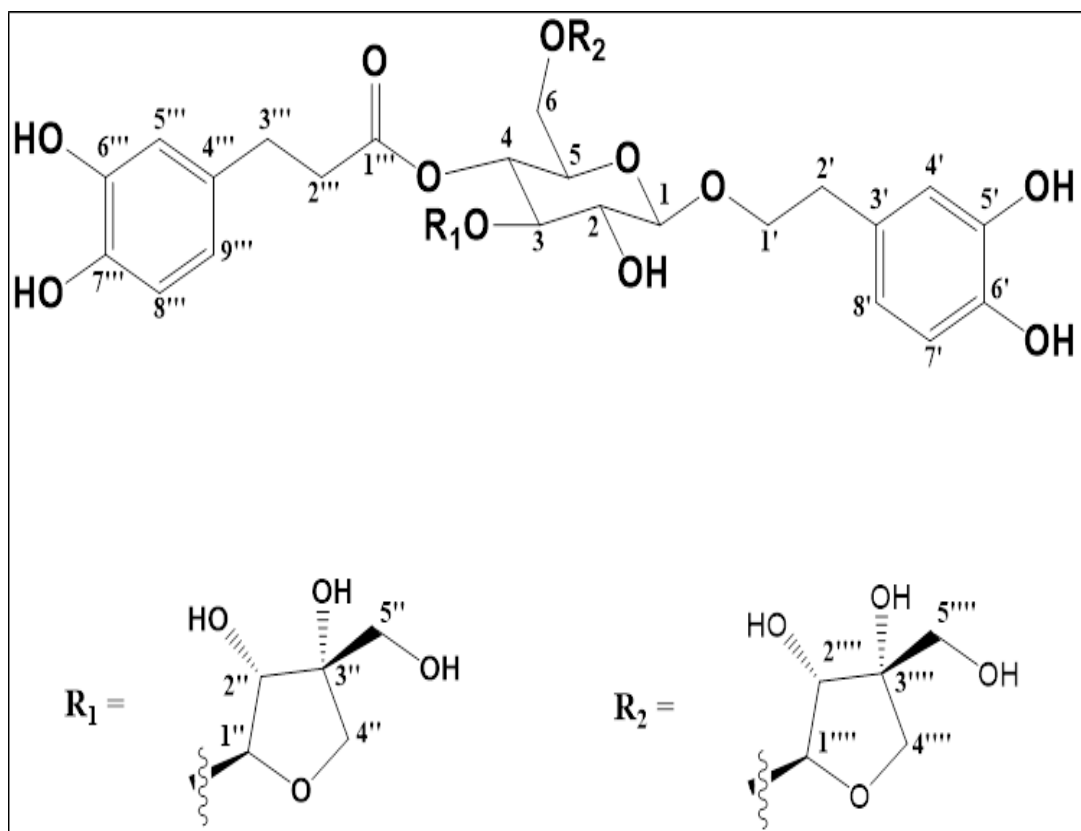

**Figure S3. Structure of myconoside. \* From Salvador Canigueral, Maria Jose Salvia, Roser Vila, Jose Iglesias, Albert Virgili and Teodor Parella, "New Polyphenol Glycosides from Ramonda myconi", J. Nat. Prod. 1996, 59, 419-422.**

**Table S4. Table of signals of  $^1\text{H}$  and  $^{13}\text{C}$  of Myconoside in the present study and previously published (the table is on the next page)**



| Position | Literature in Ac-d <sub>6</sub> * |                 | This work in MeOH-d <sub>4</sub> |                 |
|----------|-----------------------------------|-----------------|----------------------------------|-----------------|
|          | <sup>1</sup> H                    | <sup>13</sup> C | <sup>1</sup> H                   | <sup>13</sup> C |
| 1        | 4.38 (d,7.8)                      | 103.60          | 4.41 (d,8.0)                     | 102.32          |
| 2        | 3.39 (t,7.6)                      | 75.40           | 3.40 (dd,8.1,9.2)                | 73.4            |
| 3        | 3.70 (dd,9.5,7.5)                 | 80.60           | 3.68 (t,9.2)                     | 81.8            |
| 4        | 4.78 (dd,9.5,10.0)                | 70.40           | 4.84 (dd,ov.)                    | 69.32           |
| 5        | 3.62 (ddd,2.5,6.4,10.0)           | 74.10           | 3.58 (m)                         | 72.48           |
| 6        | 3.55 (dd,11.5,2.5)                | 67.70           | 3.51 (dd,2.2,11.5)               | 66.3            |
|          | 3.36 (dd,11.5,6.4)                |                 | 3.22 (dd,5.5,11.5)               |                 |
| 1'       | 3.95 (ddd,6.9,7.7,9.7)            | 71.50           | 4.01 (ddd,6.8,7.8,14.7)          | 71.05           |
|          | 3.68 (ddd,7.0,7.7,9.5)            |                 | 3.78 (ddd,7.0,8.0,14.7)          |                 |
| 2'       | 2.75 m                            | 36.20           | 2.81 (m)                         | 34.82           |
| 3'       |                                   | 131.10          |                                  | 130.78          |
| 4'       | 6.75 (d,2.1)                      | 116.30          | 6.78 (d,2.1)                     | 116             |
| 5'       |                                   | 145.60          |                                  | 142.9           |
| 6'       |                                   | 144.20          |                                  | 144.5           |
| 7'       | 6.70 (d, 8.0)                     | 116.10          | 6.79 (d,8.0)                     | 116             |
| 8'       | 6.58 (dd,2.1,8.0)                 | 121.00          | 6.66 (dd,2.1,8.0)                | 120.68          |
| 1''      | 5.35 (d,1.9)                      | 111.00          | 5.24 (d,2.9)                     | 110.41          |
| 2''      | 3.88 (br.)                        | 77.60           | 3.95 (d,2.9)                     | 76.94           |
| 3''      |                                   | 80.10           |                                  | 81.88           |
| 4''      | 3.85 (d,9.5)                      | 74.80           | 3.82 (d,9.9)                     | 73.44           |
|          | 3.69 (d,9.5)                      |                 | 3.76 (d,9.9)                     |                 |
| 5''      | 3.53 (br.)                        | 65.70           | 3.58 (m)                         | 63.59           |
| 1'''     |                                   | 172.60          |                                  | 173.5           |
| 2'''     | 2.65 (m)                          | 36.80           | 2.71 (m)                         | 35.74           |
| 3'''     | 2.80 (m)                          | 30.70           | 2.82 (m)                         | 29.43           |
| 4'''     |                                   | 133.30          |                                  | 132.36          |
| 5'''     | 6.73 (d,2.1)                      | 116.20          | 6.75 (d,2.1)                     | 115.75          |
| 6'''     |                                   | 145.70          |                                  | 142.9           |
| 7'''     |                                   | 144.20          |                                  | 144.5           |
| 8'''     | 6.71 (d,8.0)                      | 115.90          | 6.80 (d,8.0)                     | 116             |
| 9'''     | 6.55 (dd,2.1,8.0)                 | 120.30          | 6.63 (dd,2.1,8.0)                | 119.98          |
| 1''''    | 4.90 (d,2.0)                      | 110.50          | 4.84 (d,2.7)                     | 109.14          |
| 2''''    | 3.90 (br.)                        | 77.70           | 3.91 (d,2.7)                     | 76.67           |
| 3''''    |                                   | 80.10           |                                  | 81.75           |
| 4''''    | 3.91 (d,9.5)                      | 74.60           | 3.95 (d,10.0)                    | 73.64           |
|          | 3.72 (d,9.5)                      |                 | 3.82 (d,10.0)                    |                 |
| 5''''    | 3.58 (br.)                        | 65.50           | 3.62 (m)                         | 63.98           |

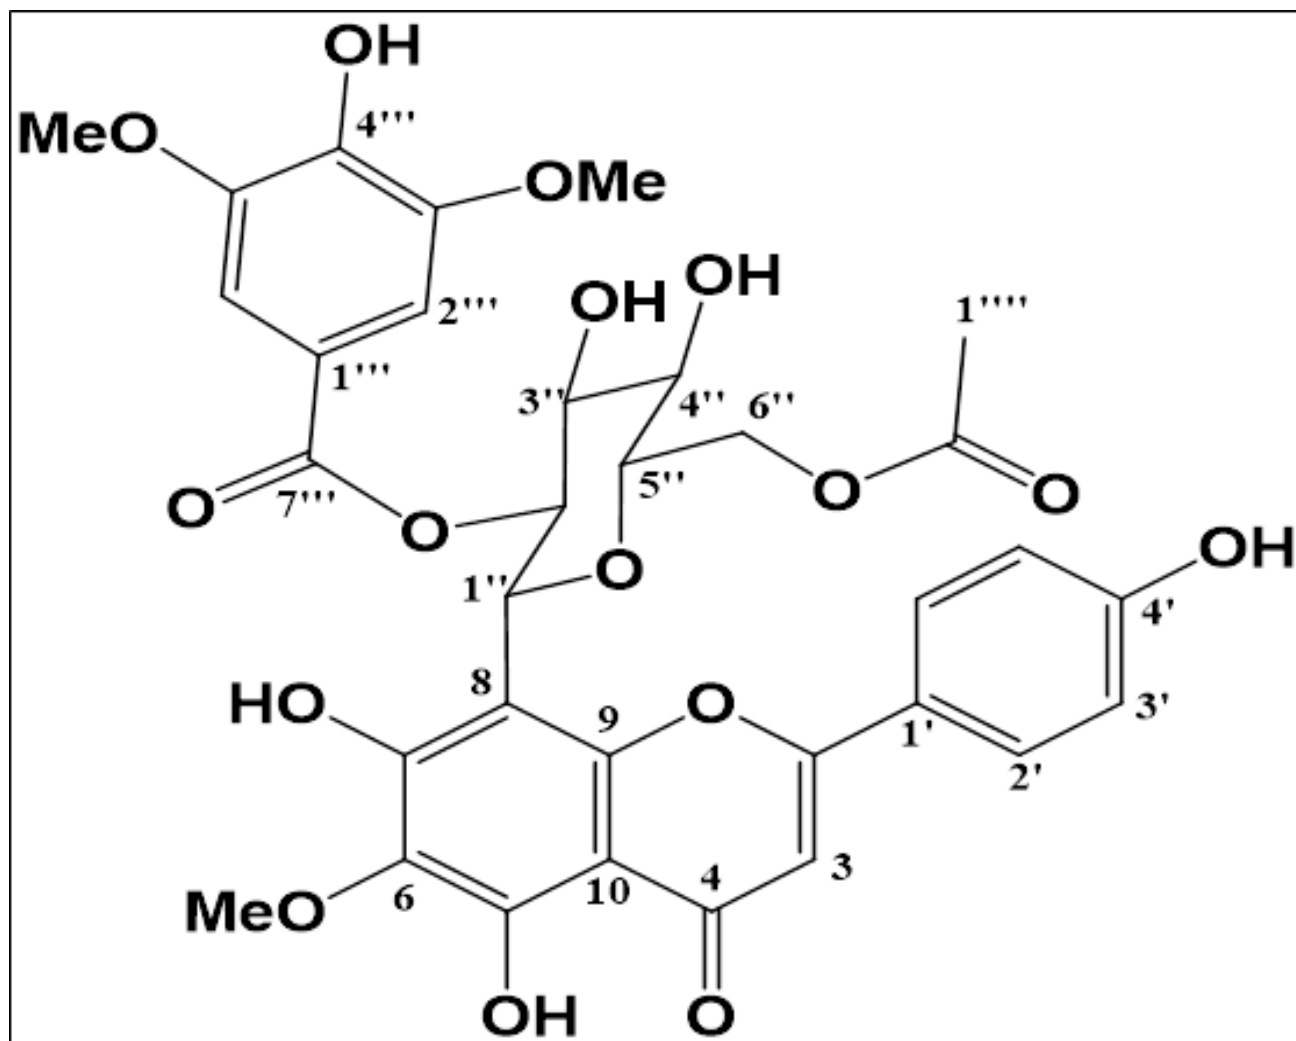

**Figure S4. Structure of Hispidulin 8-C-(6-O-acetyl-2''-O-syringoyl-β-glucopyranoside)**

**\* From Samad N. Ebrahimia, Frank Gafner, Giorgio Dell'Acqua, Kuno Schweikert, and Matthias Hamburger "Flavone 8-C-Glycosides from *Haberlea rhodopensis* Friv. (Gesneriaceae)", *Helvetica Chimica Acta* – Vol. 94 (2011) 38.**

**Table S5. Table of  $^1\text{H}$  signals of Hispidulin 8-C-(6-O-acetyl-2''-O-syringoyl- $\beta$ -glucopyranoside) in the present study and previously published**

| <b>Position</b> | <b>literature in DMSO-<math>\text{d}_6^*</math></b> | <b>This work in <math>\text{CDCl}_3</math></b> |
|-----------------|-----------------------------------------------------|------------------------------------------------|
| 3               | 6.73                                                | 6.81 s                                         |
| 2',6'           | 8.34 (d, 8,6)                                       | 8.36 (d,8.8)                                   |
| 3',5'           | 6.91 (d, 8,6)                                       | 7.03 (d, 8.8)                                  |
| 1''             | 5.14 (d, 10,1)                                      | 5.25 (d, 10.1)                                 |
| 2''             | 5.8 (dd,10,1;10,3)                                  | 6.00 (t, 9.9)                                  |
| 3''             | 3.92 (dd,10,3;7,6)                                  | 4.14* m                                        |
| 4''             | 3.98 9dd,unes.)                                     | 4.25* m                                        |
| 5''             | 4,00 (m)                                            | 4.14 *m                                        |
| 6''a            | 4.32 (dd, 11,5;3,5)                                 | 4.45* m                                        |
| 6''b            | 4,18 (dd, 11,5;7,2)                                 | 4.25* m                                        |
| 2''',6'''       | 7,00                                                | 7.15 s                                         |
| Me-1''''        | 2,00                                                | 2.09 s                                         |
| MeO-6           | 3.48                                                | 2.50 s                                         |
| MeO-3''',5'''   | 3.77                                                | 3.87 s                                         |
